# Supplementary material for: Anin situSERS study of plasmonic nanochemistry based on bifunctional “hedgehog-like” arrays
Source: Royal Society of Chemistry journal article supplement (doi:10.1039/c9nr01297d), 2019-01-01
Supplement: c9nr01297d1.pdf [file c9nr01297d1.pdf]

Supporting Information

***In situ* SERS Study of Plasmonic Nanochemistry Based on  
Bifunctional “Hedgehog-like” Arrays**

Yuduo Guan, Zengyao Wang, Panpan Gu, Yu Wang, Wei Zhang and Gang Zhang\*

State Key Laboratory of Supramolecular Structure and Materials, College of Chemistry, Jilin University, Changchun 130012, P. R. China. E-mail: gang@jlu.edu.cn

\*To whom correspondence should be addressed and G.Z. proposed and supervised the project.

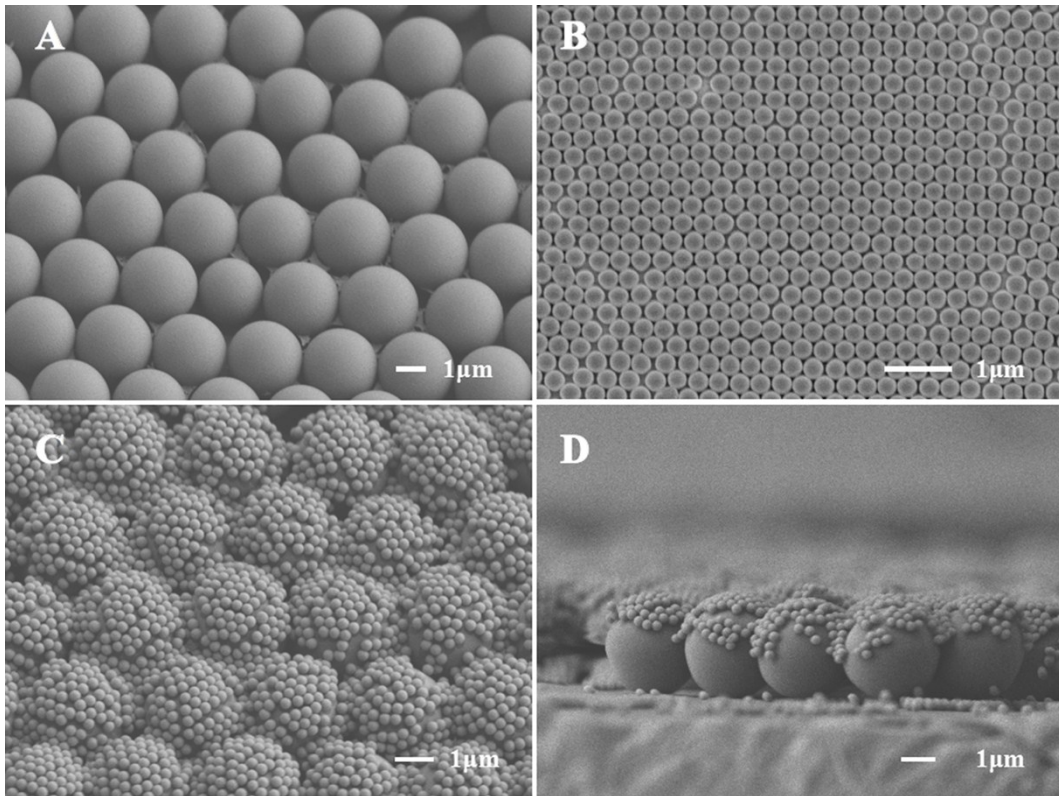

**Figure S1.** The SEM images of (A) PS microsphere substrate and (B) nanosphere etching masks. (C) 60° tilting view and (D) cross-sectional view of fabricated binary colloidal crystals.

The HLAs etched for 150 s is the best SERS substrate and also has the best catalytic activity (**Figure S2**). As RIE duration  $t$  increasing from 150 s to 240 s, the PS-3 underneath was further longitudinally etched, leading it an ellipse gradually. As the curvature of the upper surface of PS-3 decreases gradually, the light utilization rate of the HLAs in the third dimension also decreases. Therefore, when the PS-0.3 template was just completely etched, the structure had the maximum utilization rate for light, as well as the best SERS and catalytic activity.

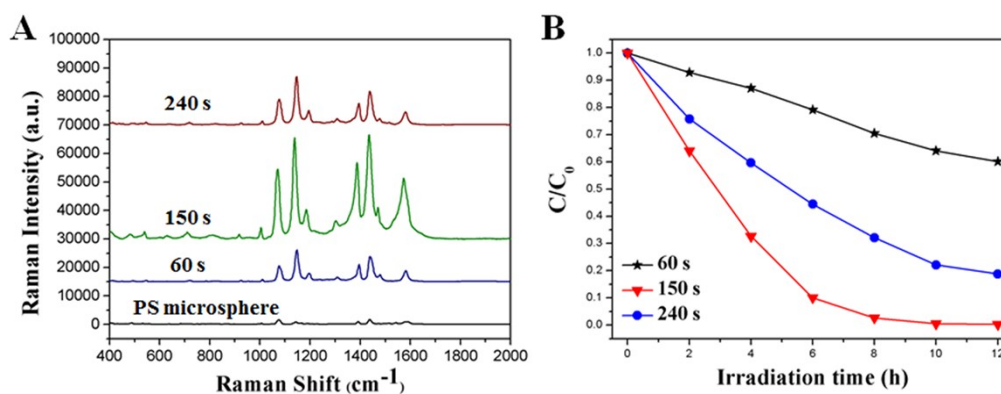

**Figure S2.** (A) SERS spectra of  $1 \times 10^{-5}$  M p-aminothiophenol (PATP) collected on HLAs etched for different times. (B) Time dependent concentration of the MB solution with HLAs etched for different times.

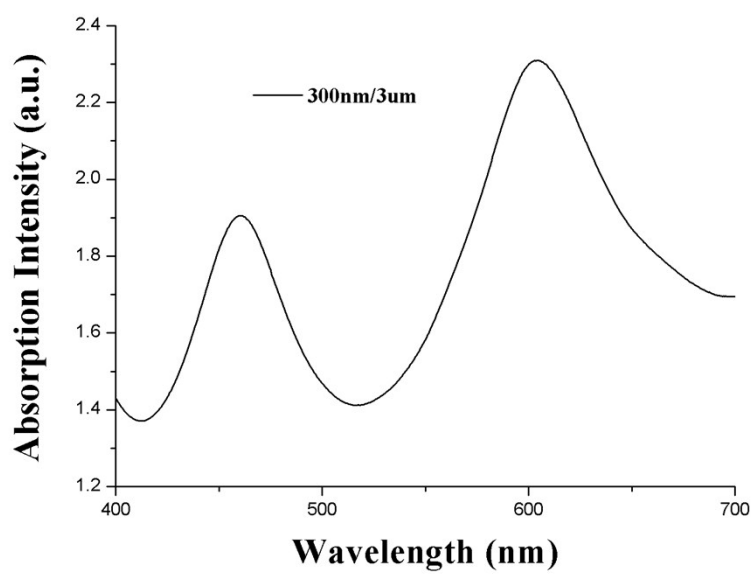

**Figure S3.** UV-Vis absorption spectrum of the HLAs.

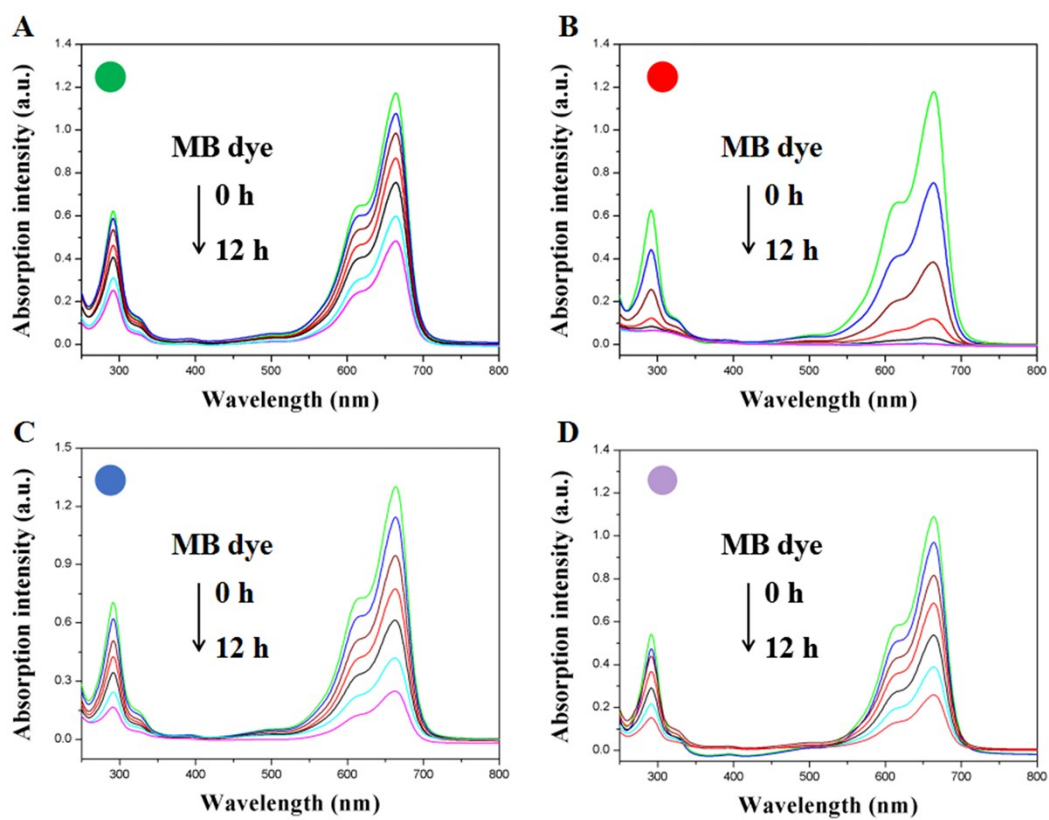

**Figure S4.** UV-Vis absorption spectra of MB under different irradiation times with the HLAs exposed to different wavelengths of light: (A) green light, (B) red light, (C) blue light and (D) UV light.

We have proved the existence of  $\bullet\text{O}_2$  and  $\bullet\text{OH}$  in the process of reactions under the illumination. First, we investigated the  $\bullet\text{OH}$  generation from the HLAs by using sodium terephthalate as a probe. As shown in **Figure S5A**, after the exposure to illumination for 10 min, the fluorescence intensity of the solution contained HLAs was obviously increased compared to the control group. It proved that  $\bullet\text{OH}$  is generated in the solution with HLAs under illumination.<sup>1</sup> Then, the  $\bullet\text{O}_2$  was measured with the Superoxide Assay Kit (S0060, Beyotime, China) in the solution with HLAs after the exposure to illumination for 10 min. Compared with the control groups, the UV-Vis absorption spectrum of the solution with HLAs is significantly enhanced at the wavelength of 450 nm (**Figure S5B**), which proves the existence of  $\bullet\text{O}_2$  in the solution with HLAs under illumination.<sup>2</sup>

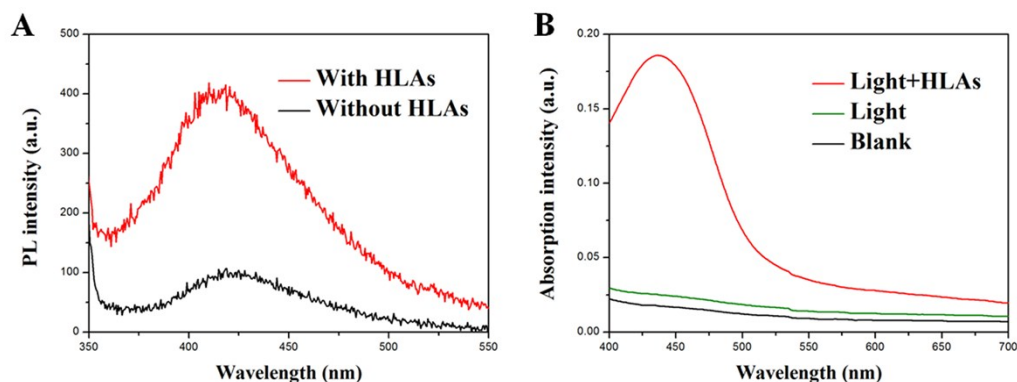

**Figure S5.** (A) Fluorescence spectrum of  $\bullet\text{OH}$  detection by sodium terephthalate. (B) UV-Vis absorption spectra of  $\bullet\text{O}_2$  detection by Superoxide Assay Kit.

## Notes and references

1. Z. Guo, S. Zhu, Y. Yong, X. Zhang, X. Dong, J. Du, J. Xie, Q. Wang, Z. Gu, Y. Zhao, *Adv. Mater.* 2017, **29**, 1704136.
2. G. Wang, W. Jin, A. M. Qasim, A. Gao, X. Peng, W. Li, H. Feng, P. K. Chu, *Biomaterials* 2017, **124**, 25-34.
